# Supplementary material
Source: publisher figshare collection journal article supplement (https://frontiersin.figshare.com/ndownloader/files/17461916)
Supplement: Supplementary file [file 17461916]

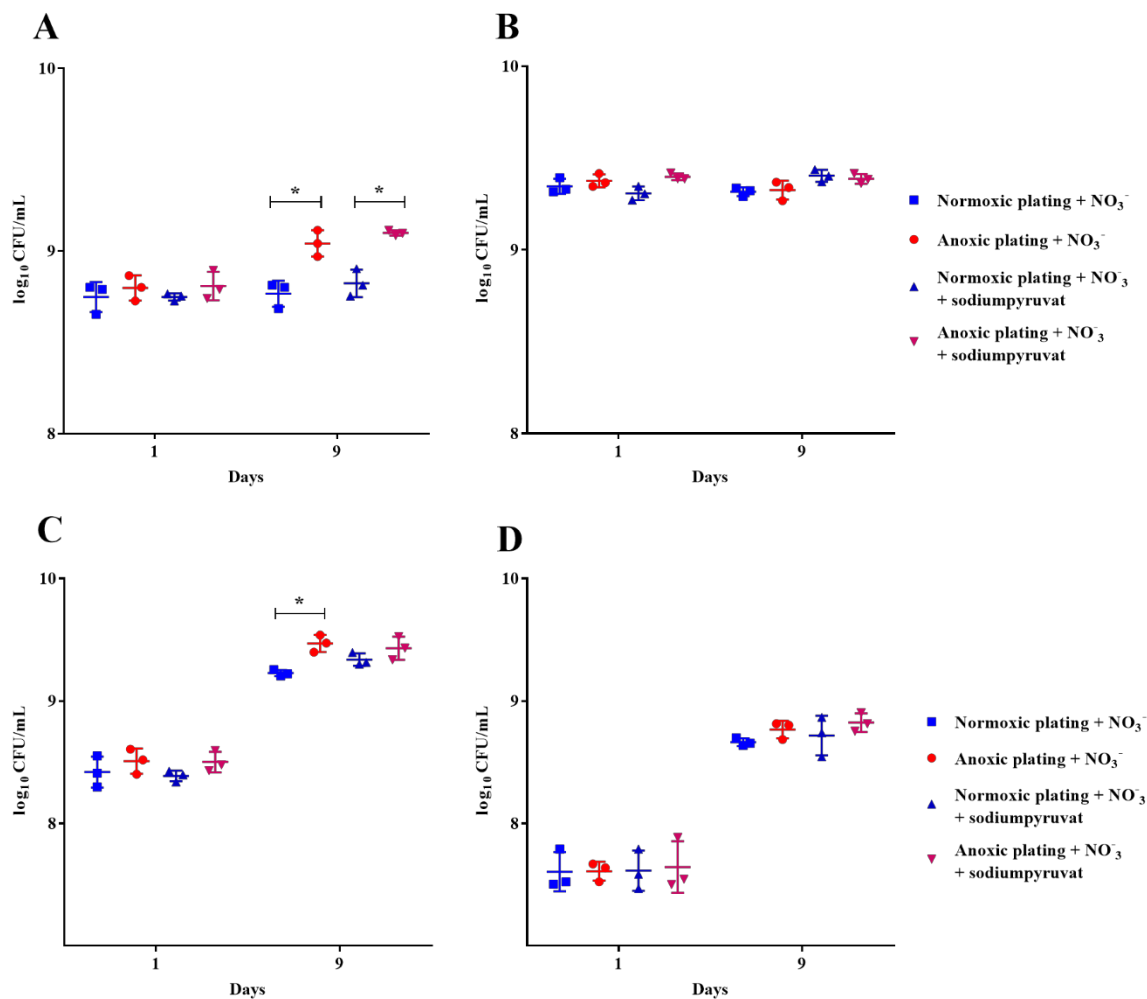

**S2 - An oxygen intolerant subpopulation of *Staphylococcus aureus* (MRSA) and *Staphylococcus epidermidis* was generated in the filter biofilm model.**

Normoxic and anoxic ( $\pm$  sodium pyruvate) determination of CFU/mL were determined for 1 and 9-day-old anoxically (A) and normoxically (B) conditioned filters with *Staphylococcus aureus* (MRSA) and anoxically (C) and normoxically (D) conditioned filters with *Staphylococcus epidermidis*. Significant difference between anoxic and normoxic plating  $\pm$  sodium pyruvate at day 9 ( $p = 0.01$  and  $p < 0.01$ , respectively, One-way ANOVA test) for *S. aureus*. Significant difference between anoxic and normoxic plating at day 9 ( $p = 0.003$ , One-way ANOVA test) for *S. epidermidis*. Symbols with error bars indicate the mean  $\pm$  SEM ( $n = 3$ ). +NO<sub>3</sub><sup>-</sup> refers to the addition of 10 mM KNO<sub>3</sub> to LB agar plates.
